# Supplementary material for: Extinction blunts paraventricular thalamic contributions to heroin relapse
Source: PubMed Central journal article supplement (PMC8418780; doi:10.1016/j.celrep.2021.109605), 2021-08-24
Supplement: NIHMS1735790-supplement-1.pdf [file NIHMS1735790-supplement-1.pdf]

**Cell Reports, Volume 36**

**Supplemental information**

**Extinction blunts paraventricular thalamic  
contributions to heroin relapse**

**Giuseppe Giannotti, Sheng Gong, Nicholas Fayette, Jasper A. Heinsbroek, James E. Orfila, Paco S. Herson, Christopher P. Ford, and Jamie Peters**

## Supplemental information

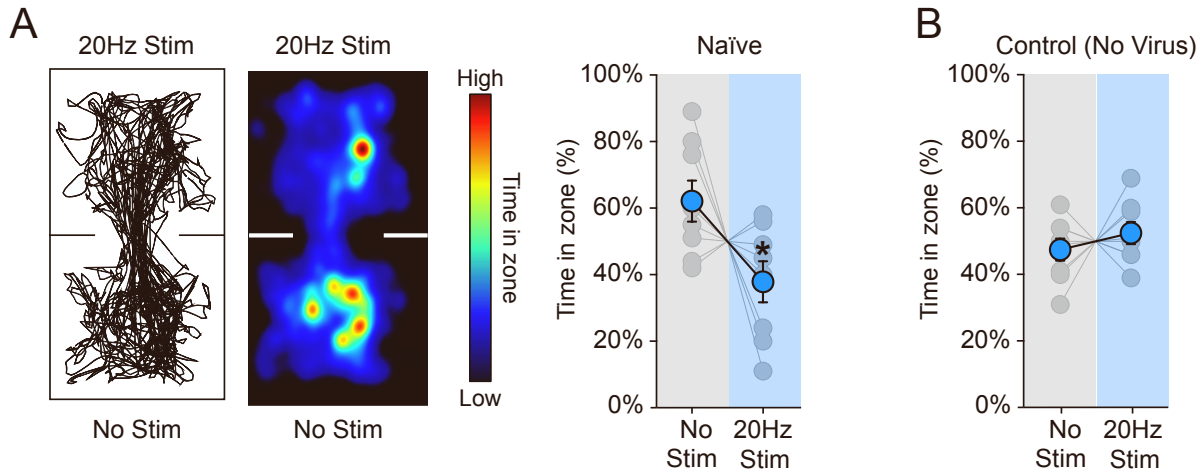

**Figure S1: Optogenetic activation of PVT→NAc pathway induces aversion in naïve animals (related to Figure 2 and Figure 3). A)** Example trace (left) and heatmap (middle) of real-time CPA test. Optogenetic activation (20Hz, 20ms) of the PTV→NAc pathway induced real-time CPA in naïve animals. **B)** Stimulation of PVT (20Hz, 20ms) in the absence of ChR2 has no effect in a real-time CPA test. \*  $p < 0.05$  vs. no stim condition. Data are shown as mean  $\pm$  SEM.

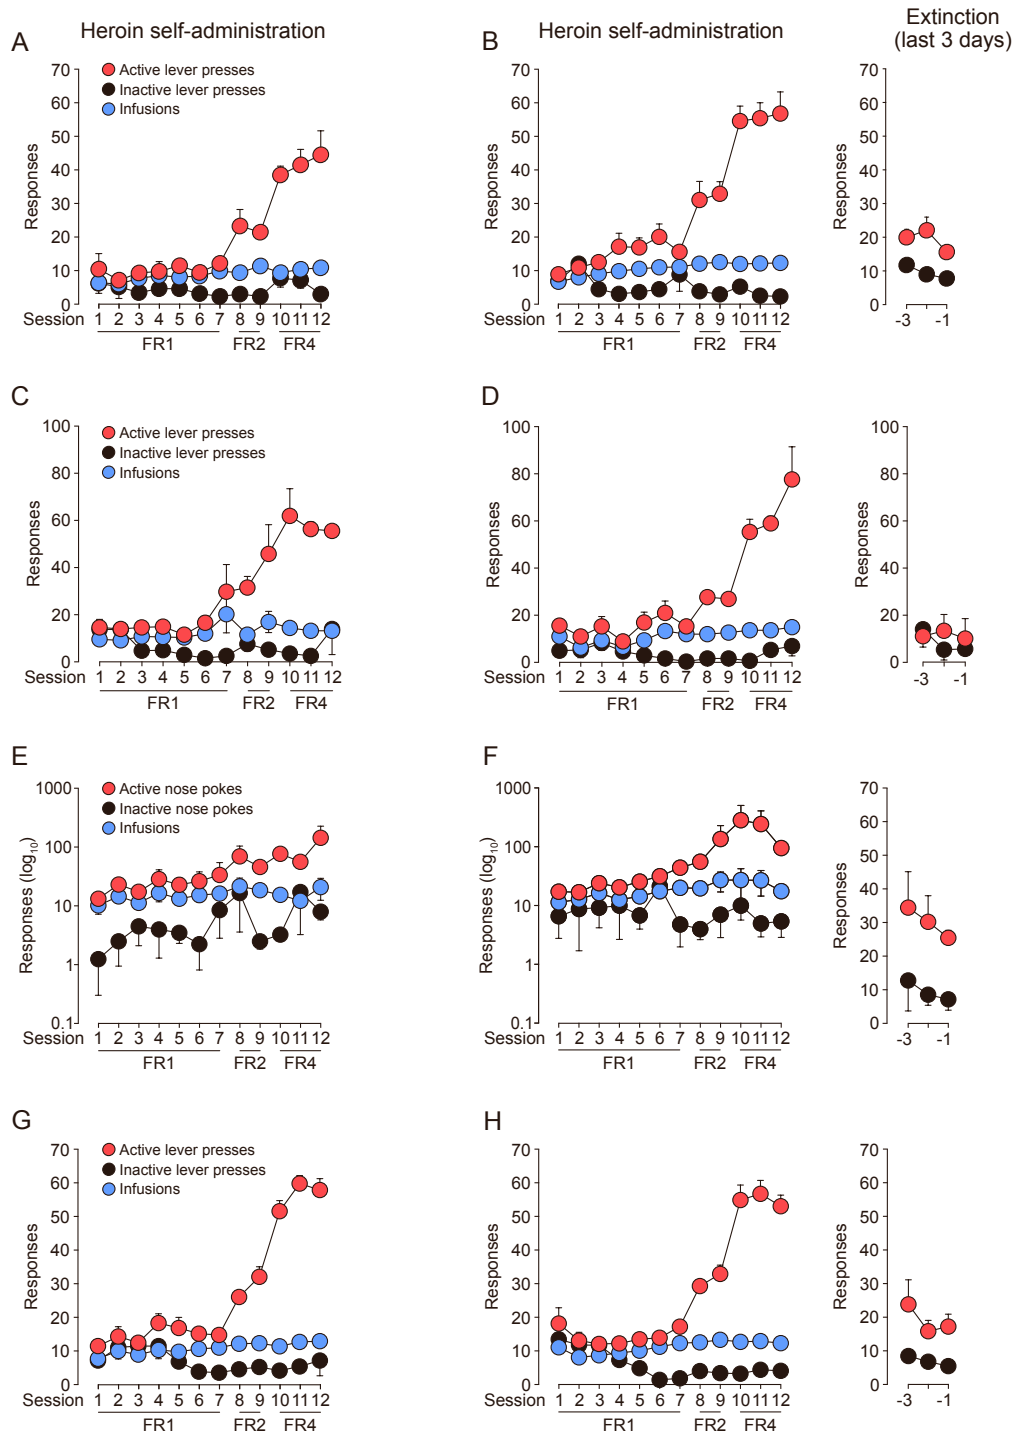

**Figure S2. Heroin self-administration and extinction (related to Figure 2, Figure 3, Figure 4, Figure 5, and Figure S4).** Heroin self-administration of the abstinence (**A**) and the extinction group (**B, left**) for the optogenetic experiments. Panel **B (right)** shows last 3 days of extinction training. Heroin self-administration of the abstinence (**C**) and the extinction group (**D, left**) for the field post-synaptic potential experiments. Panel **D (right)** shows last 3 days of extinction training. Heroin self-administration of the abstinence (**E**) and the extinction group (**F, left**) for the LTD experiments in the D2-eGFP mice. Panel **F (right)** shows last 3 days of extinction. Heroin self-administration of the abstinence (**G**) and the extinction group (**H, left**) for the chemogenetic experiments. Panel **H (right)** shows last 3 days of extinction training. Data are shown as mean  $\pm$  SEM.

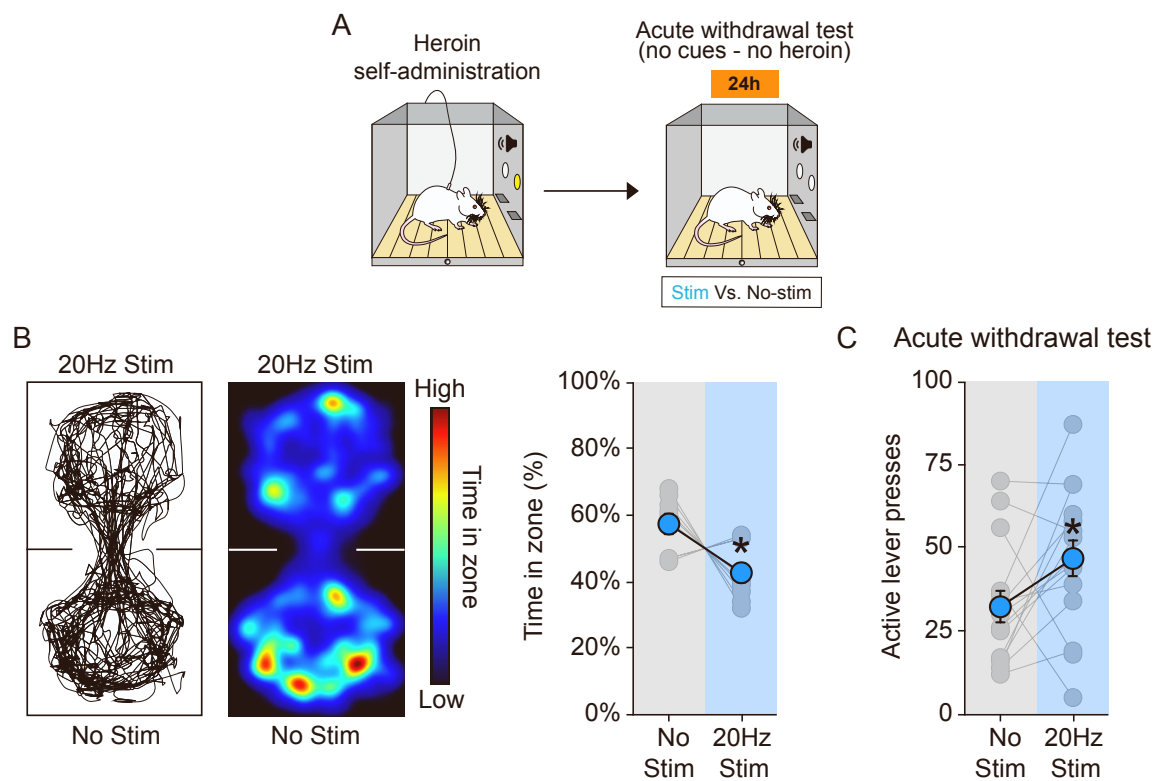

**Figure S3: Optogenetic activation of the PVT→NAC pathway induces aversion and drives heroin seeking during early withdrawal from heroin self-administration (related to Figure 3).** **A)** Timeline employed for the behavioral experiment. Optogenetic activation (20Hz, 20ms) of the PVT→NAC pathway induces aversion **(B)** and drives heroin seeking **(C)** during early (24 h) withdrawal from heroin self-administration. \*  $p < 0.05$  vs. no stim condition. Data are shown as mean  $\pm$  SEM.

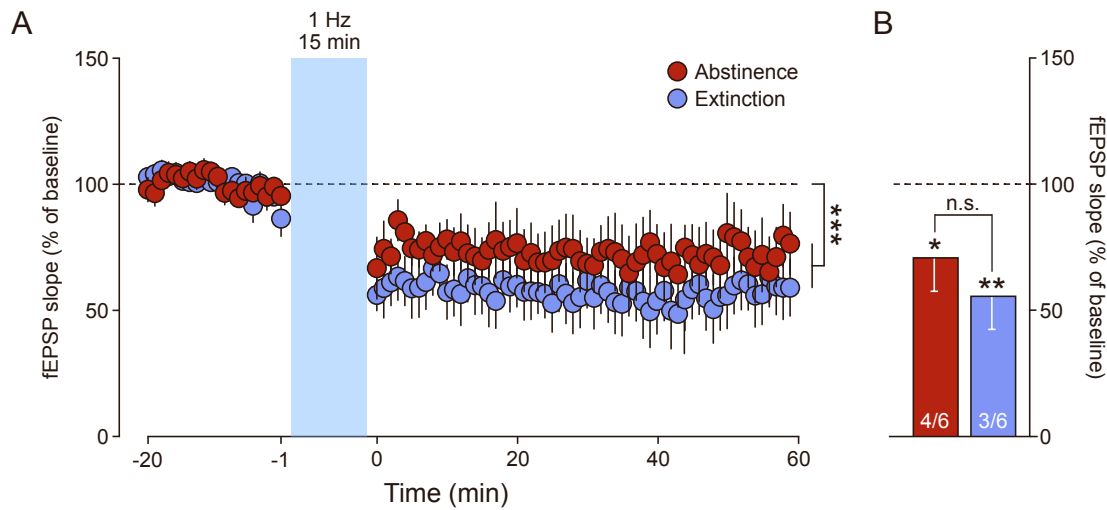

**Figure S4: LTD stimulation protocol of ChR2-expressing PVT terminals in the NAc drives synaptic plasticity after extinction and abstinence from heroin self-administration (related to figure 4). A)** Time course of optogenetic evoked field excitatory post-synaptic potential (fEPSP) slopes in NAc slices from abstinence and extinction animals (\*\* $p < 0.001$ , main effect of the time). **B)** Optogenetic stimulation (1 Hz - 900 pulses) of ChR2-expressing PVT terminals in the NAc induces LTD after abstinence and extinction from heroin self-administration (average of the last 20 min post-LTD; \*  $p < 0.05$ , \*\*  $p < 0.01$  vs baseline). Data are shown as mean  $\pm$  SEM.
